# Supplementary material for: Epigenetic origin of evolutionary novel centromeres
Source: PubMed Central journal article supplement (PMC5290474; doi:10.1038/srep41980), 2017-02-03
Supplement: srep41980-s1.pdf [file srep41980-s1.pdf]

# Epigenetic origin of evolutionary novel centromeres

Doron Tolomeo<sup>1,†</sup>, Oronzo Capozzi<sup>1,†</sup>, Roscoe R. Stanyon<sup>2</sup>, Nicoletta Archidiacono<sup>1</sup>,  
Pietro D'Addabbo<sup>1</sup>, Claudia R. Catacchio<sup>1</sup>, Stefania Purgato<sup>3</sup>, Giovanni Perini<sup>3</sup>,  
Werner Schempp<sup>4</sup>, John Huddleston<sup>5-6</sup>, Maika Malig<sup>5</sup>, Evan E. Eichler<sup>5-6</sup> and Mariano  
Rocchi<sup>1,\*</sup>

<sup>1</sup>Department of Biology, University of Bari, Bari, Italy, <sup>2</sup>Department of Biology,  
University of Florence, 50122 Florence, Italy, <sup>3</sup>Department of Pharmacy and  
Biotechnology, University of Bologna, Bologna, Italy, <sup>4</sup>Institute of Human Genetics,  
University of Freiburg, 79106 Freiburg, Germany, <sup>5</sup>Department of Genome Sciences,  
University of Washington School of Medicine, Seattle, WA 98195, USA, <sup>6</sup>Howard  
Hughes Medical Institute, University of Washington, Seattle, WA 98195, USA

\* Correspondence to [mariano.rocchi@uniba.it](mailto:mariano.rocchi@uniba.it)

† these authors contributed equally to this work

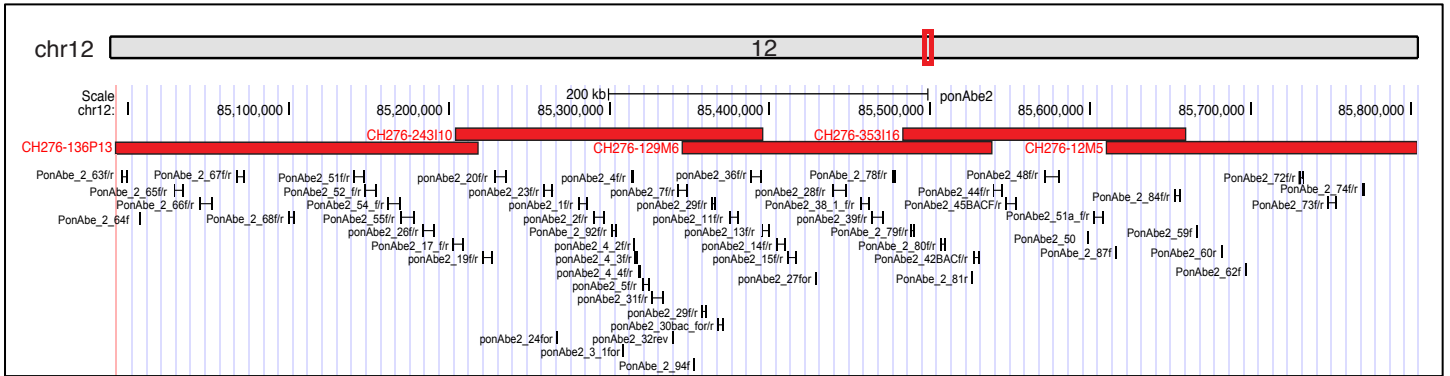

**Supplementary Figure S1.** Distribution of Sanger sequenced LR-PCR ends (black vertical bars) with respect to the *ponAbe2* sequence of chromosome 12 and to the 5 sequenced BACs of the CH276 library (red rectangles). Some ends are not reported because of their low quality. On the left of each LR-PCR product are reported the corresponding primer names.

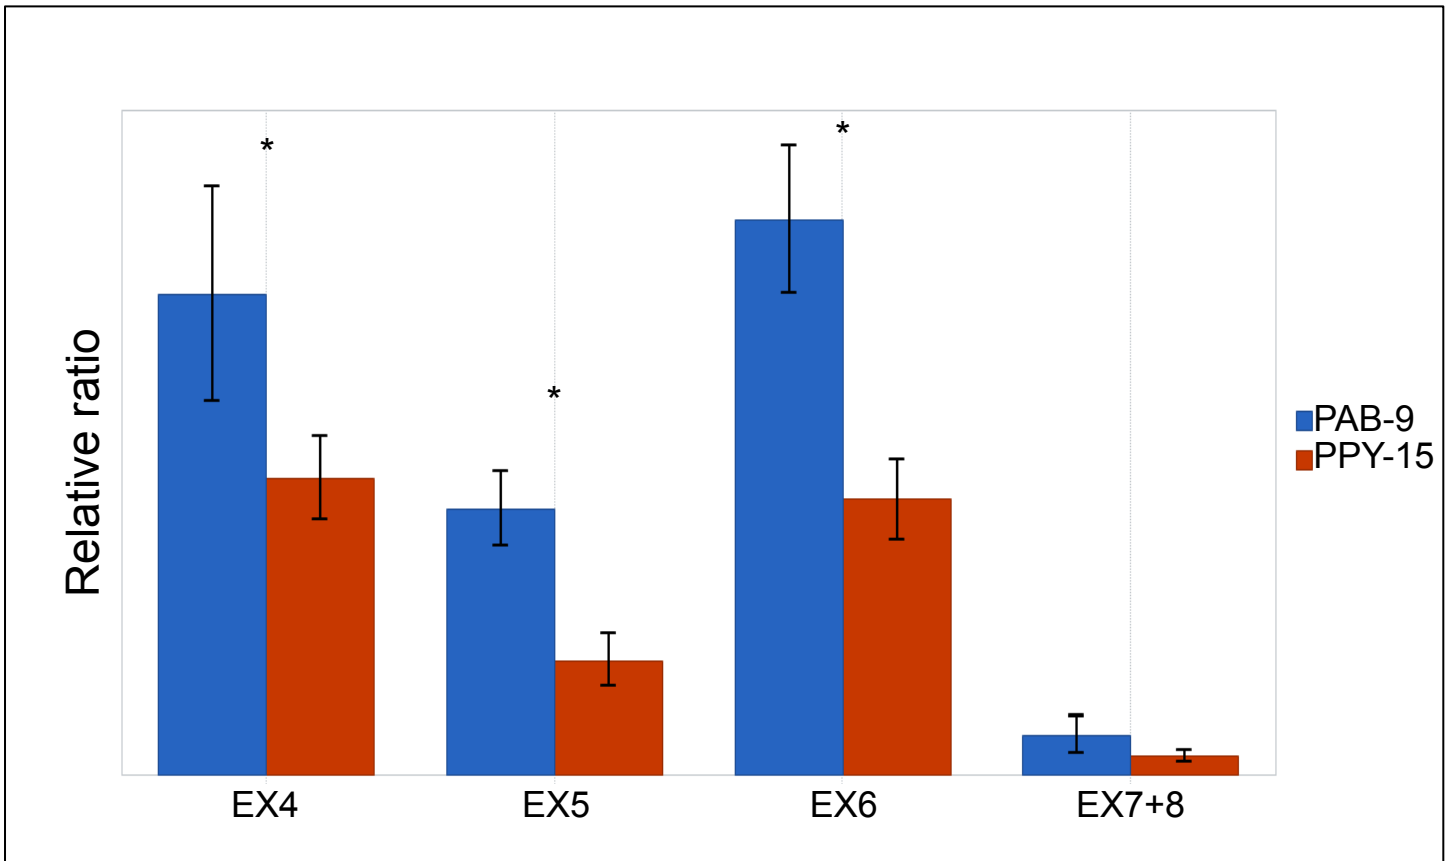

**Supplementary Figure S2.** Exon-specific reverse transcription quantitative PCR analysis of *SLC6A15*, performed in PPY-15 vs PAB-9. The statistical analysis was carried out using the LightCycler® 96 Software 1.1 (Roche). Asterisks indicate statistically significant results ( $p < 0.05$ ).



| <b>primer name</b> | <b>sequence (5'-3')</b> | <b>map position (ponAbe2)</b> |
|--------------------|-------------------------|-------------------------------|
| SLC15_4F           | TGGA ACTCTCTGTGGGTCAA   | chr12:85,479,014-85,479,033   |
| SLC15_4R           | CCATACACCAATGCTGCCTC    | chr12:85,478,984-85,479,003   |
| SLC15_5F           | CTCAGTCTTTTCAGCAACCCC   | chr12:85,478,505-85,478,525   |
| SLC15_5R           | TTTCACCAAAGGACTGATCC    | chr12:85,478,476-85,478,497   |
| SLC15_6F           | GGGCTTAAACTGGAAGATGACC  | chr12:85,476,967-85,476,988   |
| SLC15_6R           | CAAGCAAACCATGACCCAGG    | chr12:85,476,931-85,476,950   |
| SLC15_7F           | TCGCCACATGTTTACCCCTA    | chr12:85,465,882-85,465,901   |
| SLC15_8R           | GCAGCTTCTCTCCAGACCTT    | chr12:85,463,057-85,463,076   |

**Supplementary Table S3.** Primers used for RT-qPCR of the *SLC6A15* gene.
